# Supplementary material
Source: bioRxiv or medRxiv preprint supplement (https://www.biorxiv.org/highwire/filestream/92959/field_highwire_adjunct_files/5/302307-4.pdf)
Supplement: Supplementary file [file 302307-4.pdf]

A

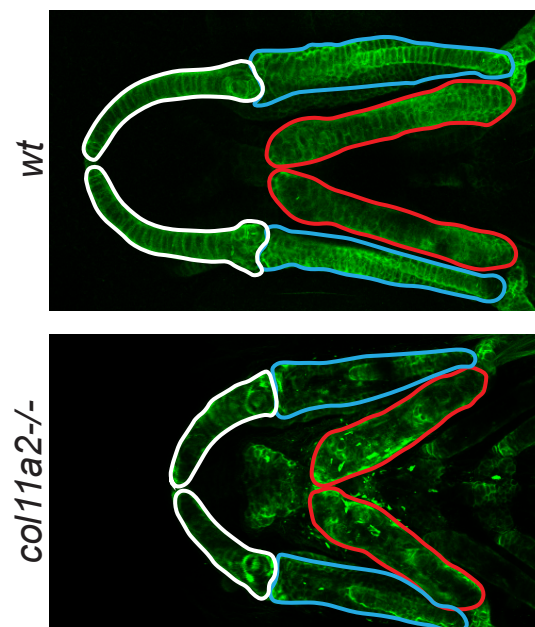

B

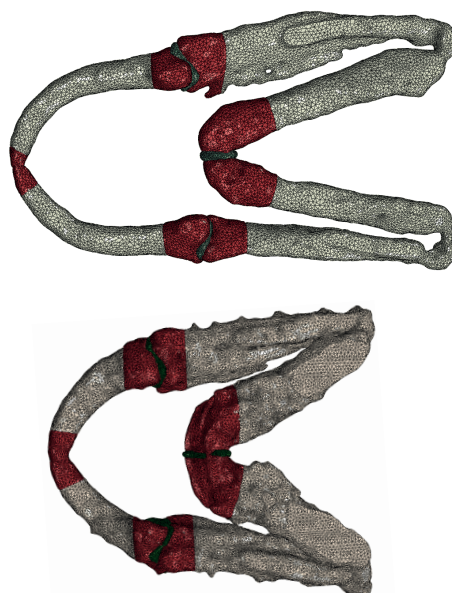

| Table 1                   | Values    |           |
|---------------------------|-----------|-----------|
|                           | Wild type | Mutant    |
| Hypertrophic chondrocytes | 7.55 MPa  | 30.53 MPa |
| Immature chondrocytes     | 4.29 MPa  | 5.48 MPa  |
| Joint                     | 0.25 MPa  | 0.25 MPa  |
| Poissons ratio            | 0.25      | 0.25      |

**Supplementary Figure 4: Segmentation of lower jaw elements and assignment of material property values.** A) The Meckel's cartilage (white), palatoquadrate (blue) and ceratohyal (red) were segmented from confocal images of 7 dpf wt and *col11a2*<sup>-/-</sup> zebrafish. B) Material properties from Atomic Force Microscopy were applied to the corresponding regions of the lower jaw. Dark red = Immature chondrocytes in the joint regions, grey = hypertrophic chondrocytes towards the middle of the cartilage element and green = joint. Table 1) values used for Finite Element model generation.
